# Supplementary material
Source: MDPI journal article supplement (https://www.mdpi.com/2313-0105/9/11/551)
Supplement: s1 [file s1]

# **Supporting Information for Bi-continuous Si/C anode materials derived from silica aerogel for lithium-ion batteries**

**Yunpeng Shan<sup>1</sup>, Junzhang Wang<sup>1</sup>, Zhou Xu<sup>1</sup>, Shengchi Bai<sup>3</sup>, Yingting Zhu<sup>3</sup>,**

**Xiaoqi Wang<sup>3</sup> and Xingzhong Guo<sup>1, 2, \*</sup>**

<sup>1</sup> State Key Laboratory of Silicon and Advanced Semiconductor Materials, Zhejiang University, Hangzhou 310058, P. R. China; 22126085@zju.edu.cn (Y.S.); 12026080@zju.edu.cn (J.W.); 18764205503@163.com (Z.X.); msewj01@zju.edu.cn (X.G.)

<sup>2</sup> Hangzhou Global Scientific and Technological Innovation Center, Zhejiang University, Hangzhou 311200, P. R. China

<sup>3</sup> PetroChina Research Institute of Petroleum Exploration & Development, Beijing 100083, P. R. China; baisc21@petrochina.com.cn (S.B.); zhuyingting@petrochina.com.cn (Y.Z.); wangxq07@petrochina.com.cn (X.W.)

\* Correspondence: msewj01@zju.edu.cn

## **Content**

- S1. Actual photos of silica aerogels, mesoporous Si and Si/C.**
- S2. Electrochemical properties of pure Si.**
- S3. CV curves of the b-Si/C-12 electrode with a potential range of 0.01-3.00 V**
- S4. Fitting results of the EIS curves**
- S5. Previous works on Si-based anode in recent years**
- S6. Cycle performance of b-Si/C-12 at a current density of 300 mA g<sup>-1</sup> (500 cycles)**

**S1. Actual photos of silica aerogels, mesoporous Si and Si/C.**

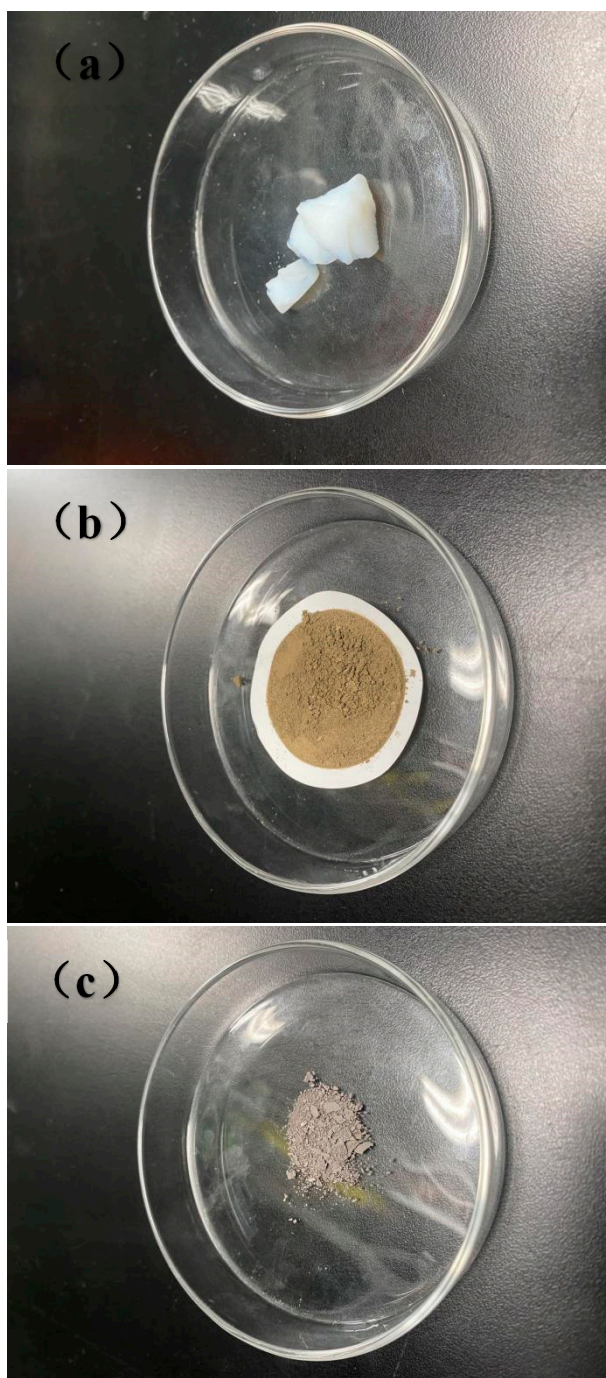

Figure S1. Actual photos of (a) silica aerogels, (b) mesoporous Si, (c) Si/C

## S2. Electrochemical properties of pure Si.

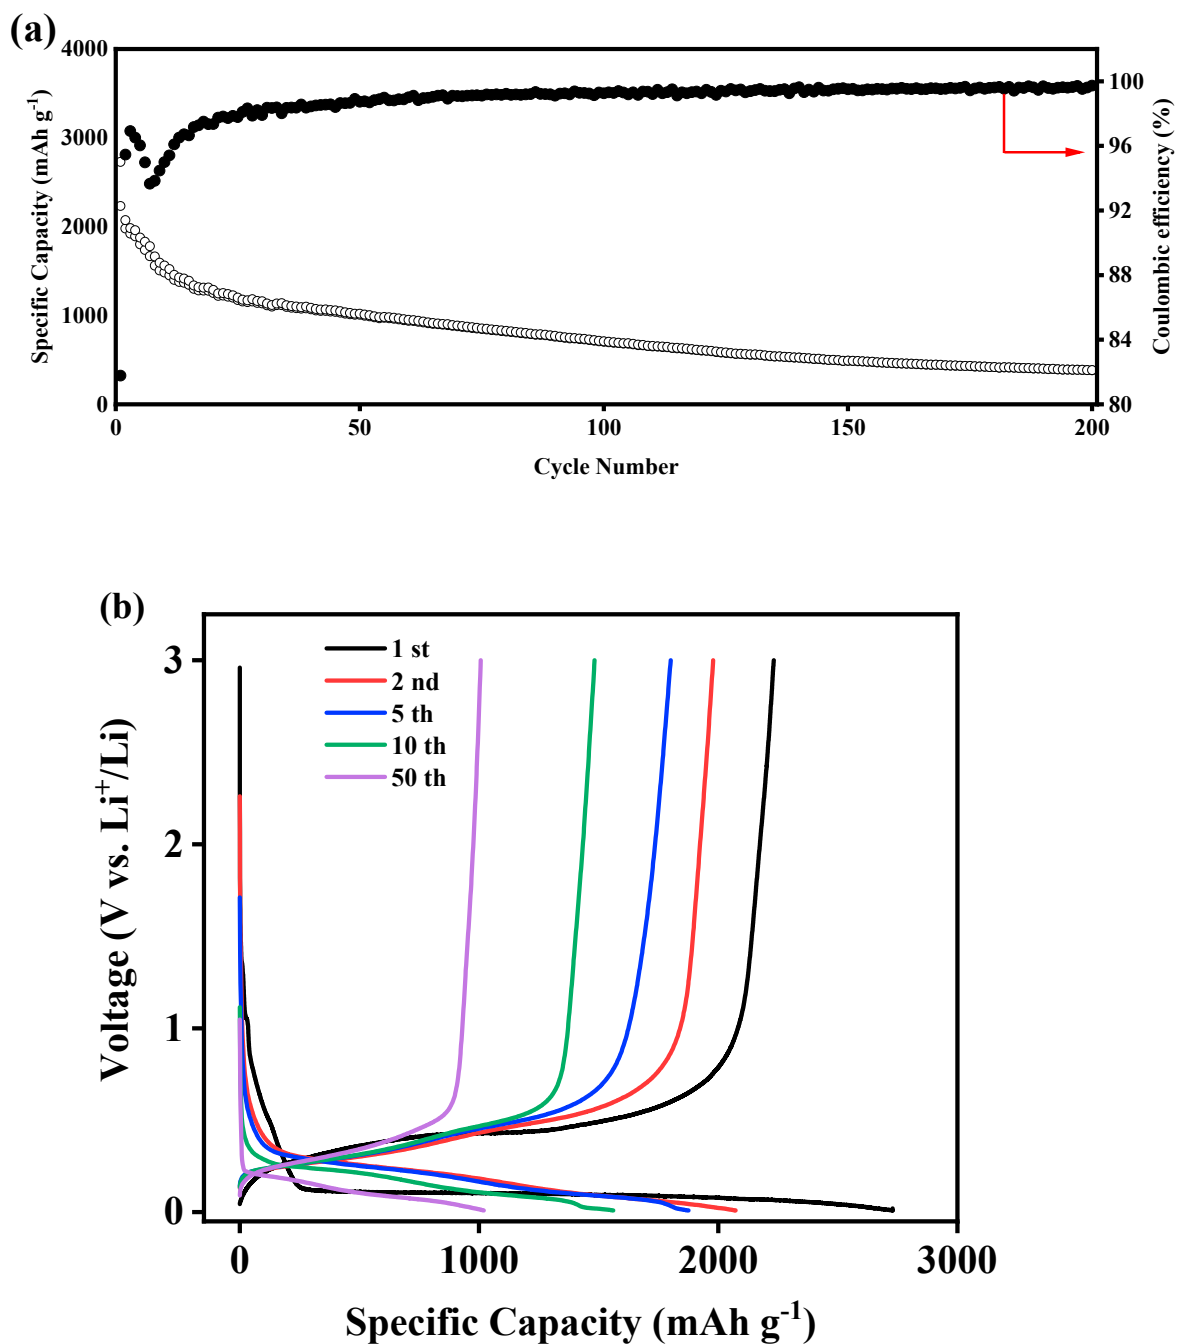

Figure S2. (a) Cycle performance of the pure Si at current density of 300 mAh g<sup>-1</sup>. (b)

Charge/discharge curves of pure Si at current density of 300 mAh g<sup>-1</sup>.

### S3. CV curves of the b-Si/C-12 electrode with a potential range of 0.01-3.00 V.

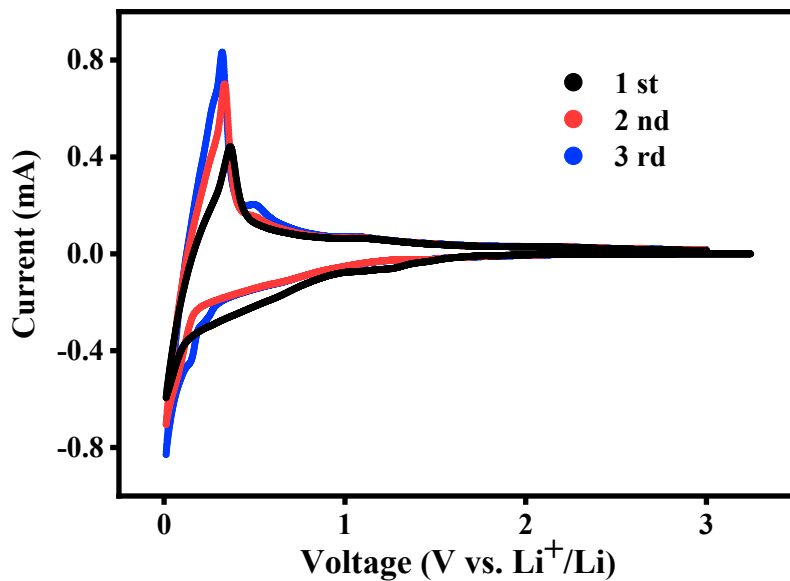

Figure S3. CV curves of the b-Si/C-12 electrode at a scan rate of  $0.5 \text{ mV s}^{-1}$ .

### S4. Fitting results of the EIS curves

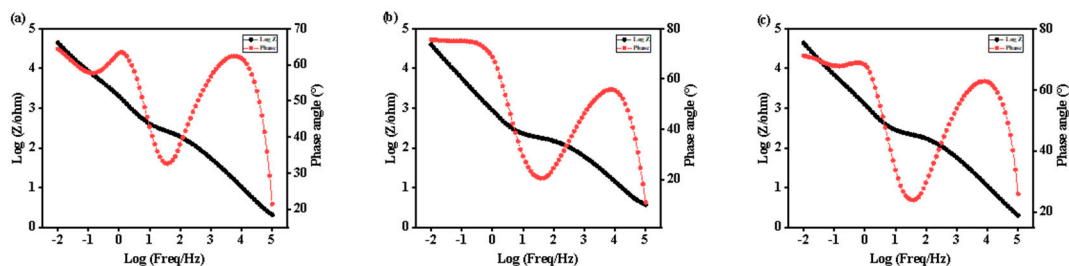

Figure S4. Bode impedance plots of (a) b-Si/C-6, (b) b-Si/C-12, and (c) b-Si/C-18.

Table S1 Fitting results of the EIS curves

| Sample    | $R_s/\Omega$ |       | $R_{ct}/\Omega$ |       | CPE                  |       |       |       | $Z_w$ |       |       |       |       |       |
|-----------|--------------|-------|-----------------|-------|----------------------|-------|-------|-------|-------|-------|-------|-------|-------|-------|
|           |              |       |                 |       | CPE-T                |       | CPE-P |       | W-R   |       | W-T   |       | W-P   |       |
|           | value        | error | value           | error | value                | error | value | error | value | error | value | error | value | error |
| m-Si/C-6  | 1.5          | 8%    | 211.2           | 7%    | $1.9 \times 10^{-5}$ | 12%   | 0.8   | 2%    | 4113  | 11%   | 0.5   | 15%   | 0.8   | 3%    |
| m-Si/C-12 | 3.0          | 7%    | 161.1           | 5%    | $1.7 \times 10^{-5}$ | 14%   | 0.8   | 2%    | 1754  | 15%   | 0.5   | 17%   | 0.8   | 3%    |
| m-Si/C-18 | 1.4          | 8%    | 191.7           | 4%    | $1.5 \times 10^{-5}$ | 10%   | 0.8   | 1%    | 2390  | 9%    | 0.5   | 10%   | 0.8   | 2%    |

## S5. Previous works on Si-based anode in recent years

Table S2 Previous works on Si-based anode in recent years

| Sample           | Current density<br>(mA g <sup>-1</sup> ) | Initial capacity<br>(mAh g <sup>-1</sup> ) | Remaining<br>capacity/Cycle<br>number (mAh g <sup>-1</sup> ) | Initial<br>coulombic<br>efficiency | Ref.      |
|------------------|------------------------------------------|--------------------------------------------|--------------------------------------------------------------|------------------------------------|-----------|
| m-Si-12          | 300                                      | 1481.7                                     | 813.5/200                                                    | 82 %                               | This work |
| Si/C hybrid      | 200                                      | 1552                                       | 1057/50                                                      | 65.6 %                             | [1]       |
| GSCC             | 200                                      | 1147                                       | 803.4/100                                                    | 78 %                               | [2]       |
| Si/C             | 100                                      | 902                                        | 678/50                                                       | 57 %                               | [3]       |
| Carbon coated Si | 200                                      | 1818                                       | 633/30                                                       | 73 %                               | [4]       |
| C/Si/CNT         | 100                                      | 1338.2                                     | 698.8/50                                                     | 54.1                               | [5]       |
| Si@C@v@CNTs      | 100                                      | 1684.2                                     | 912.8/100                                                    | 62.41                              | [6]       |

## S6. Cycle performance of b-Si/C-12 at a current density of 300 mA g<sup>-1</sup> (500 cycles)

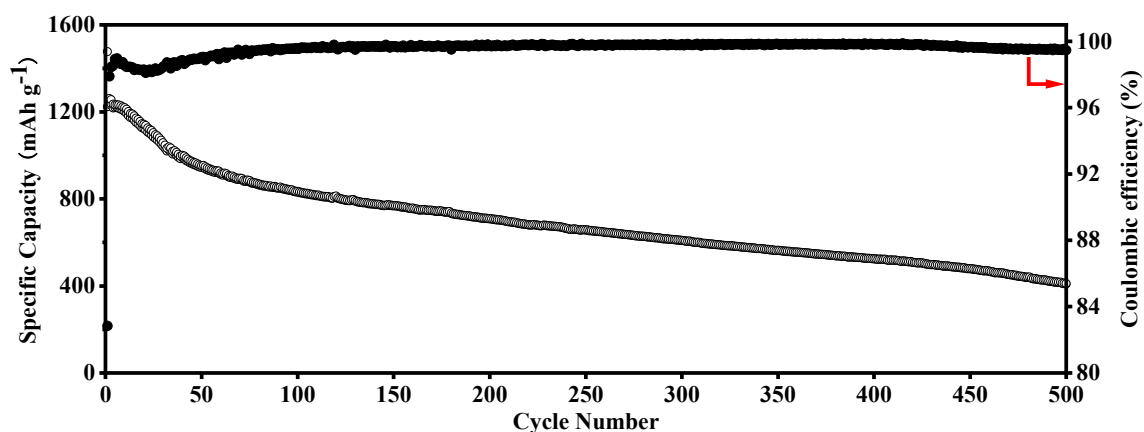

Figure S5. Cycle performance of b-Si/C-12 at a current density of 300 mA g<sup>-1</sup> (500 cycles)

## References

1. Li, Q.; Yin, L.; Gao, X. Reduction chemical reaction synthesized scalable 3D porous silicon/carbon hybrid architectures as anode materials for lithium ion batteries with enhanced electrochemical performance. *RSC Advances* **2015**, 5, 35598-35607, doi:10.1039/c5ra05342k.
2. Huang, Y.; Li, W.; Peng, J.; Wu, Z.; Li, X.; Wang, X. Structure Design and Performance of the

Graphite/Silicon/Carbon Nanotubes/Carbon (GSCC) Composite as the Anode of a Li-Ion Battery. *Energy & Fuels* **2021**, *35*, 13491-13498, doi:10.1021/acs.energyfuels.1c02138.

3. Wang, M.-S.; Fan, L.-Z. Silicon/carbon nanocomposite pyrolyzed from phenolic resin as anode materials for lithium-ion batteries. *Journal of Power Sources* **2013**, *244*, 570-574, doi:10.1016/j.jpowsour.2013.01.151.
4. Shen, L.; Guo, X.; Fang, X.; Wang, Z.; Chen, L. Magnesiothermally reduced diatomaceous earth as a porous silicon anode material for lithium ion batteries. *Journal of Power Sources* **2012**, *213*, 229-232, doi:10.1016/j.jpowsour.2012.03.097.
5. Kong, X.; Luo, S.; Rong, L.; Xie, X.; Zhou, S.; Chen, Z.; Pan, A. Enveloping a Si/N-doped carbon composite in a CNT-reinforced fibrous network as flexible anodes for high performance lithium-ion batteries. *Inorganic Chemistry Frontiers* **2021**, *8*, 4386-4394, doi:10.1039/d1qi00708d.
6. Han, N.; Li, J.; Wang, X.; Zhang, C.; Liu, G.; Li, X.; Qu, J.; Peng, Z.; Zhu, X.; Zhang, L. Flexible Carbon Nanotubes Confined Yolk-Shelled Silicon-Based Anode with Superior Conductivity for Lithium Storage. *Nanomaterials* **2021**, *11*, doi:10.3390/nano11030699.
